# Supplementary material
Source: PubMed Central journal article supplement (PMC2394997)
Supplement: supp_190_10_3721__1.pdf [file supp_190_10_3721__1.pdf]

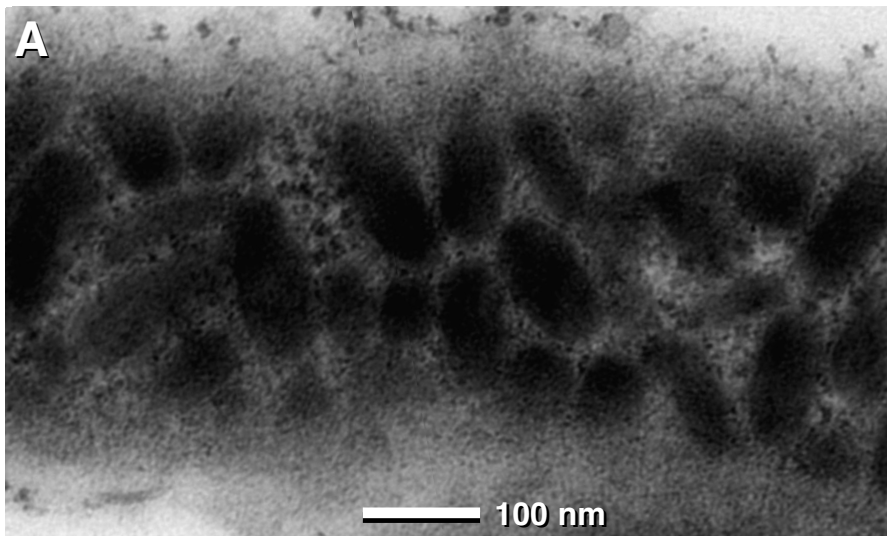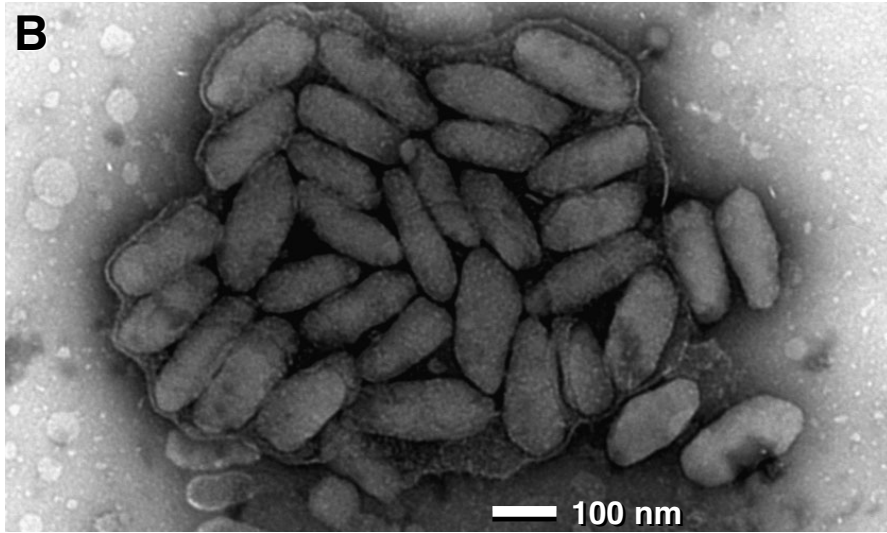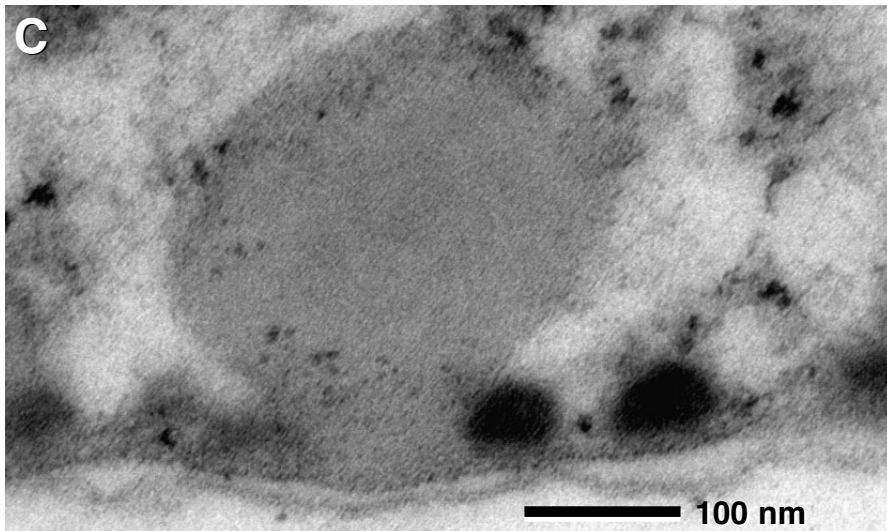

**Figure S1**

TEM of chlorosomes of the epibiont in situ (**A**) and after isolation and negative staining (**B**). The chlorosomes are rather freely orientated, covering 50-60% of the cytoplasmic membrane (**A**). Both, length and width of the chlorosomes vary in a wide range (**A; B**). **C** TEM of a lipid-body-like globule attached to the cytoplasmic membrane.

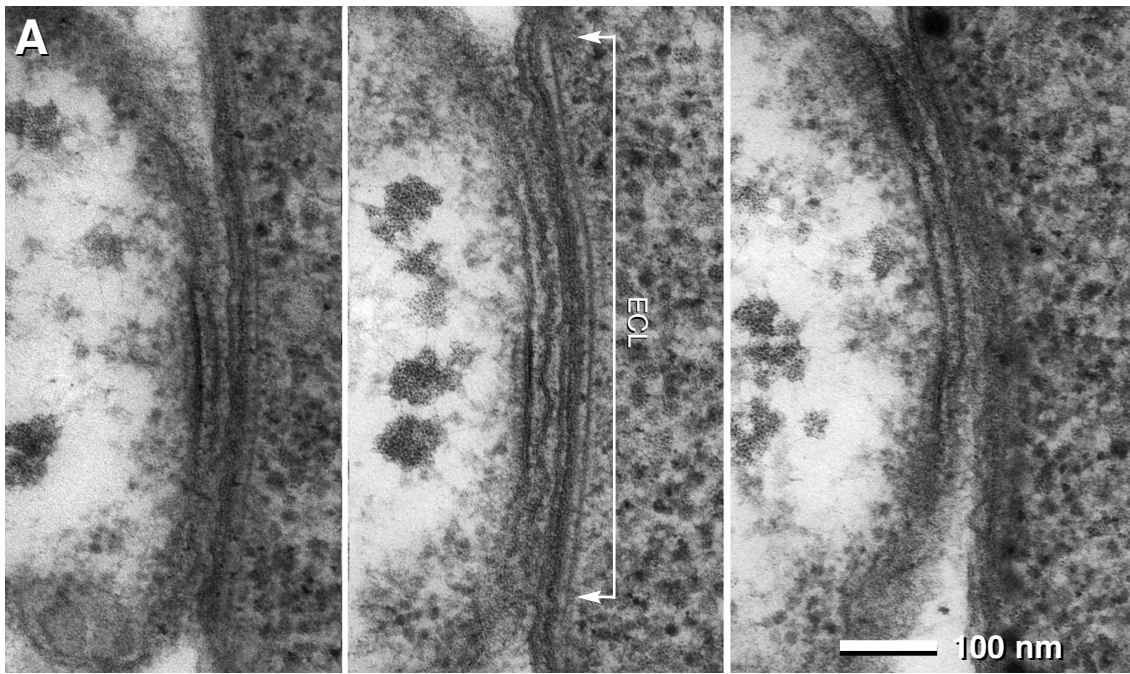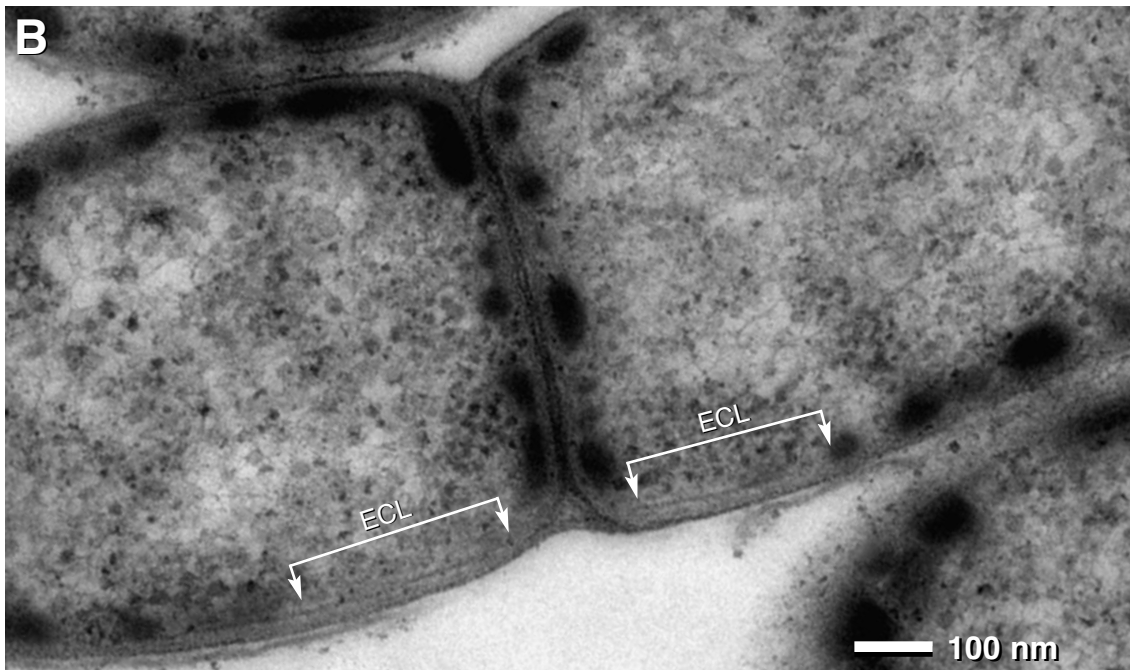

**Figure S2**

TEM of the epibiont contact layer (ECL). **A** Serial sections show that the ECL is rather narrow and therefore only visible on one to three consecutive sections. **B** The ECL of epibiont can be split during cell division.

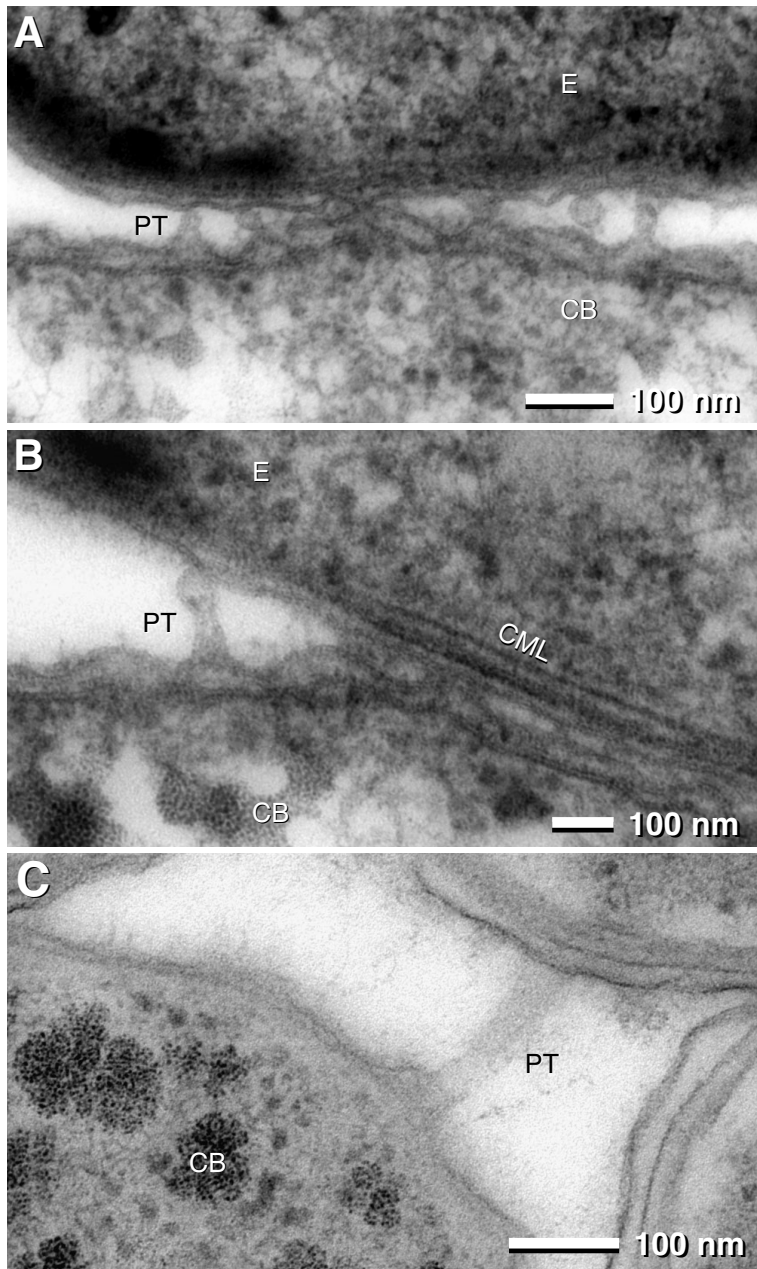

**Figure S3**

TEM of periplasmic tubules (PT) formed by the outer membrane of the central bacterium (CB). **A, B** PT in contact with the outer membrane of the epibiont. **C** TEM of cryo-fixed and cryo-substituted specimen showing a PT in continuity with the outer membrane of the central bacterium and attached to the epibiont (E).

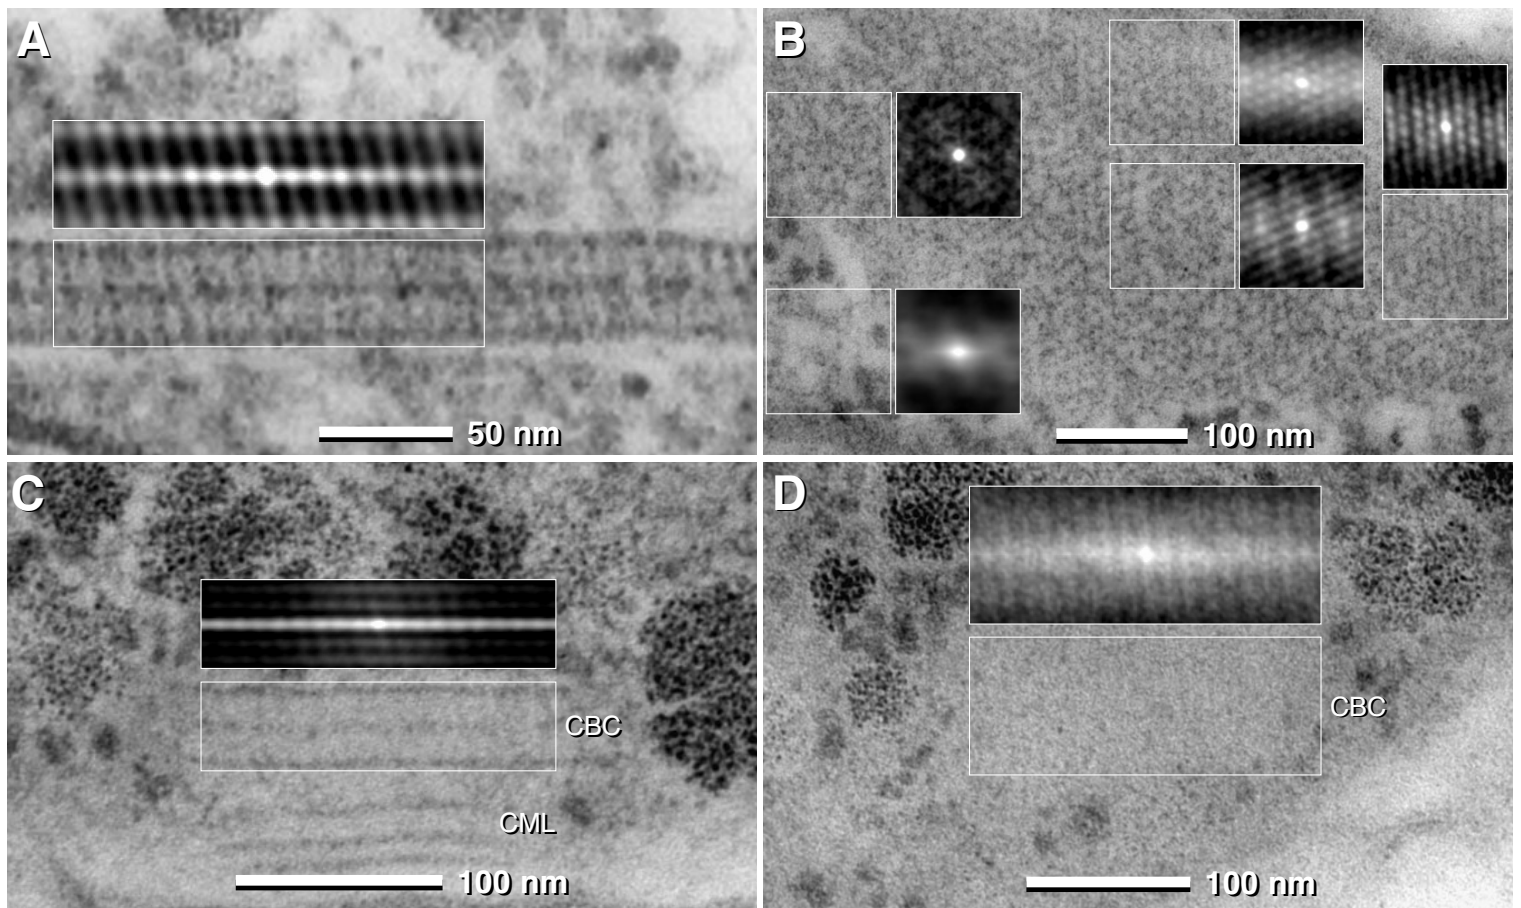

#### Figure S4

Transmission electron micrographs of ultrathin sections the central bacterium of “*C. aggregatum*” revealing paracrystalline structures (central bacterium crystal, CBC).

**A** Detail of CBC showing a paracrystalline zipper-like organization in cross sections; two less electron dense layers are bordered and separated by electron dense layers. Auto-correlation of CBC reveals oblique orientation of the subunits.

**B** Dependent on the section plane and the planity of the CBC, auto correlation of tangentially sectioned CBC shows transitional patterns between hexagonal and parallel segments.

**C, D** CBC after high pressure freezing and freeze substitution also show a paracrystalline zipper-like organization when cross sectioned; a CML is present attached to the cytoplasmic membrane (**C**). Oblique sectioned CBC shows a pattern of parallel striations with a spacing of 9 nm (**D**).

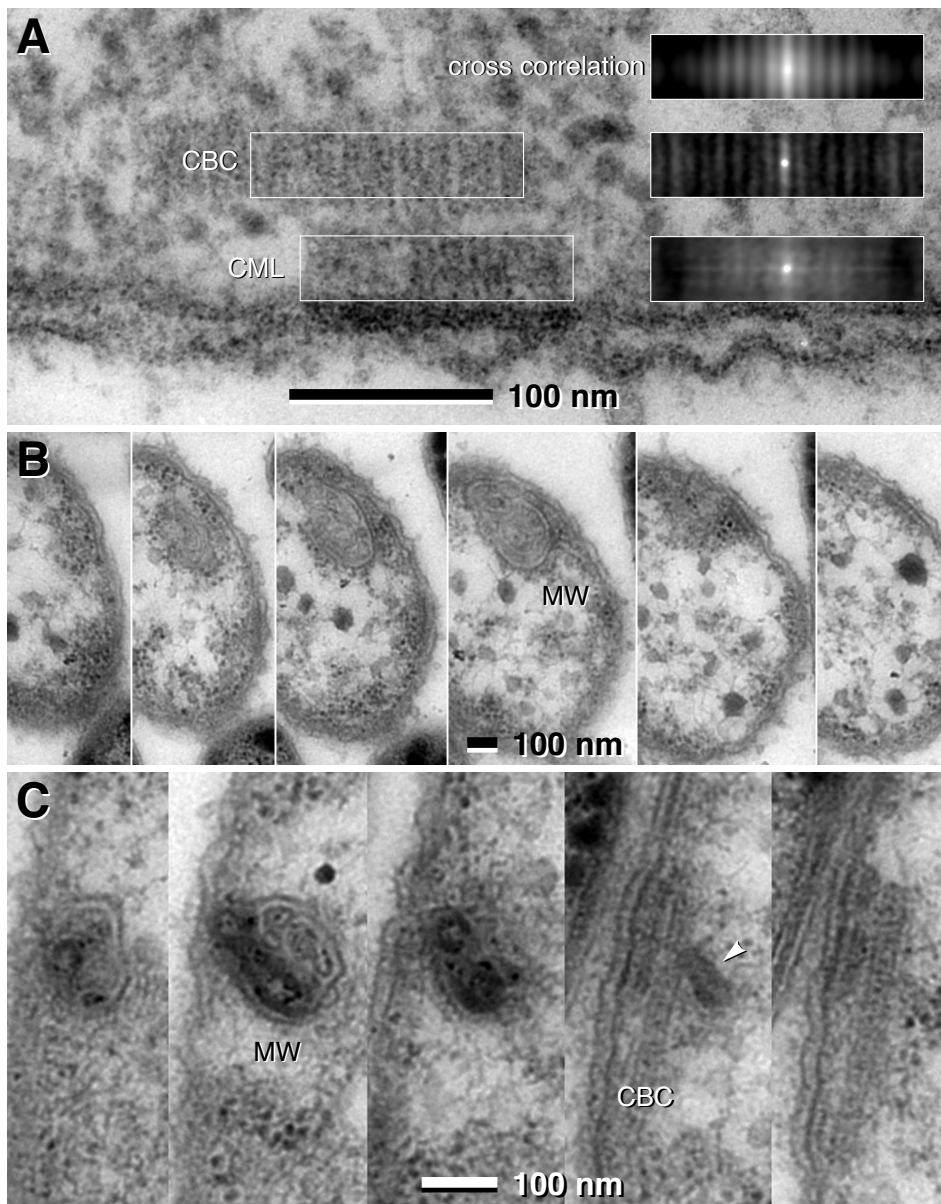

**Figure S5**

Transmission electron micrographs of ultrathin sections the central bacterium of “*C. aggregatum*” revealing the central bacterium membrane layer (CML) and membranous whirls (MW). **A** Auto-correlation and cross-correlation of oblique sectioned CML and CBC confirms that their subunit patterns are similar. **B, C** Serial sections of a MW prove that it is in contact with the cytoplasmic membrane and frequently with the CBC (**C**, arrowhead).
